# Supplementary material for: Efficacy of HDAC Inhibitors in Driving Peroxisomal β-Oxidation and Immune Responses in Human Macrophages: Implications for Neuroinflammatory Disorders
Source: MDPI journal article supplement (doi:10.3390/biom13121696), 2023-11-23

# Uncropped western blot images corresponding to Figure 2C healthy donor #1

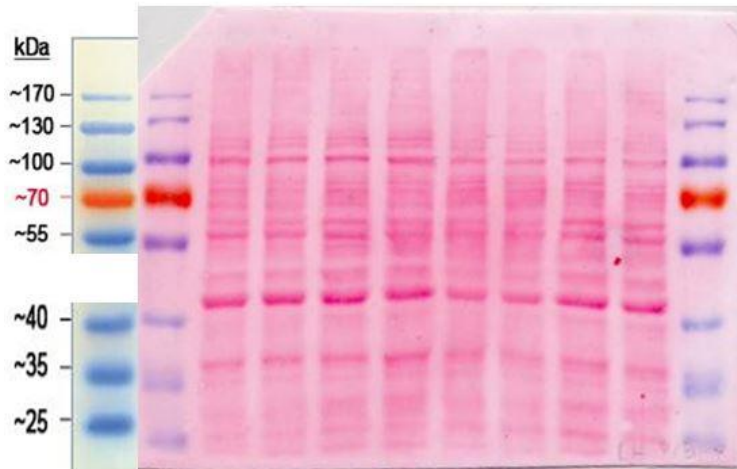

Healthy donor monocyte-derived macrophages  
after one week differentiation

M...Fermentas Protein Ladder

1...GM-CSF

2...GM-CSF

3...GM-CSF+LPS+IFN- $\gamma$

4...GM-CSF+LPS+IFN- $\gamma$

ABCD1

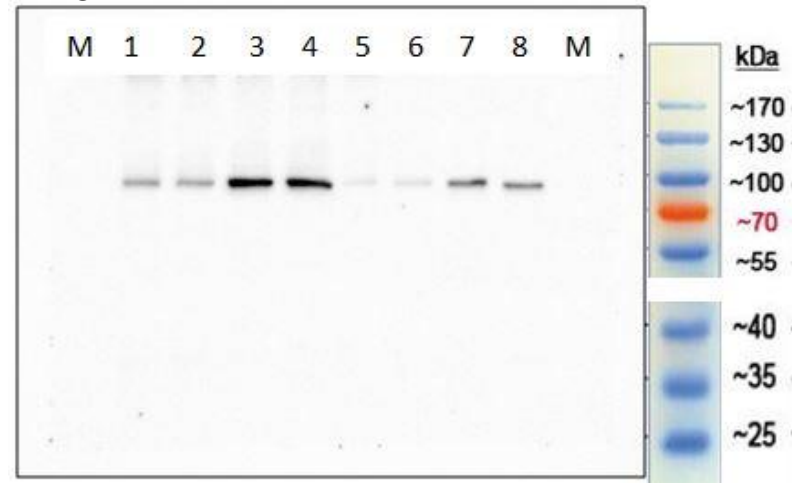

$\beta$ -actin

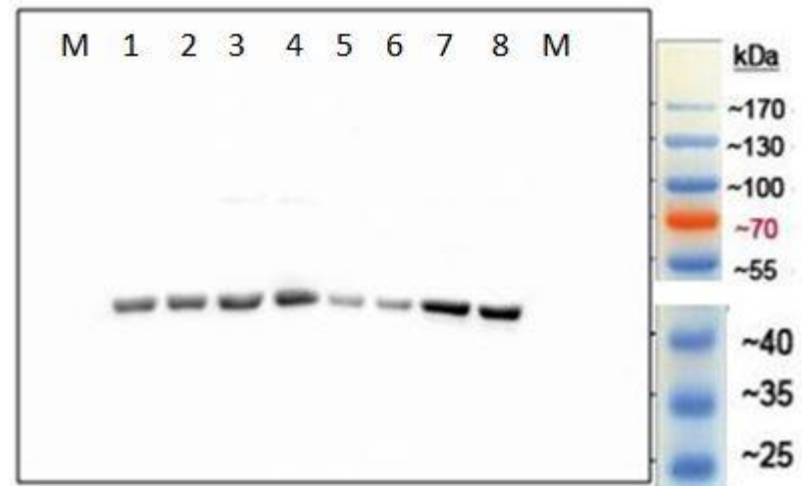

# Uncropped western blot images corresponding to Figure 2C healthy donor #2

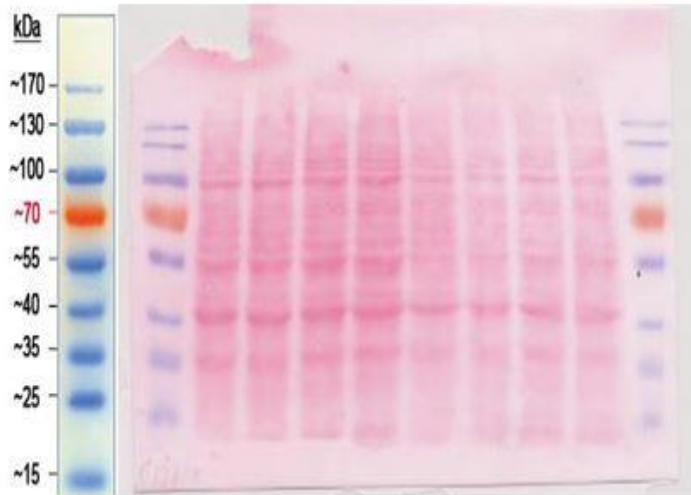

healthy donor monocyte-derived  
macrophages after one week  
differentiation

M...Fermentas Protein Ladder

1...GM-CSF

2...GM-CSF

3...GM-CSF+LPS+IFN- $\gamma$

4...GM-CSF+LPS+IFN- $\gamma$

ABCD1

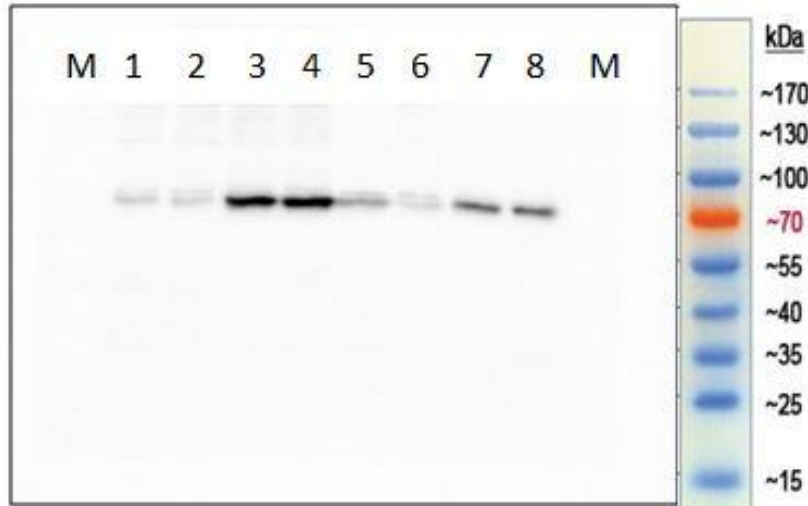

$\beta$ -actin

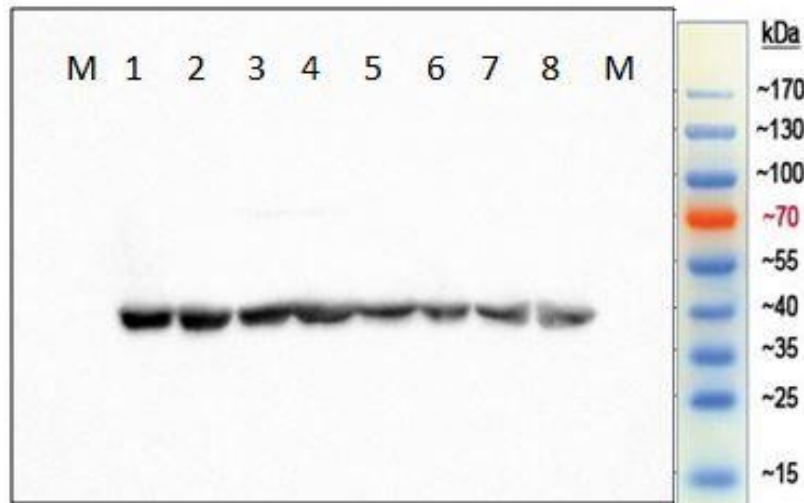

Supplement: s1 [file s1]
